# Supplementary material for: The Orally Available, Synthetic Ether Lipid Edelfosine Inhibits T Cell Proliferation and Induces a Type I Interferon Response
Source: PubMed Central journal article supplement (PMC3965404; doi:10.1371/journal.pone.0091970), 2014-03-25

## A Edelfosine-induced downregulation of expression of genes for antigen processing

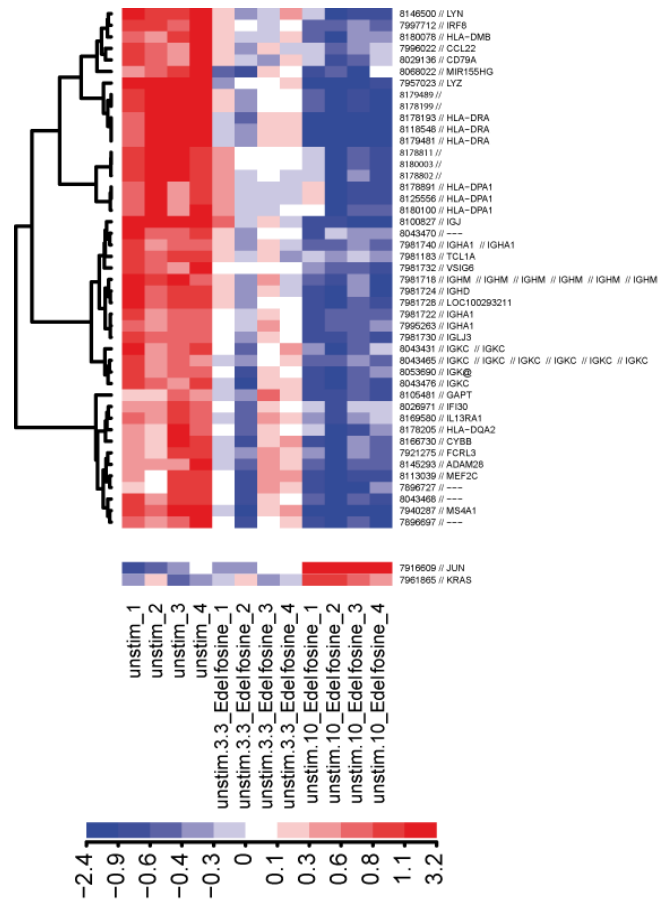

## B Edelfosine-mediated increased expression of type I interferon-associated genes

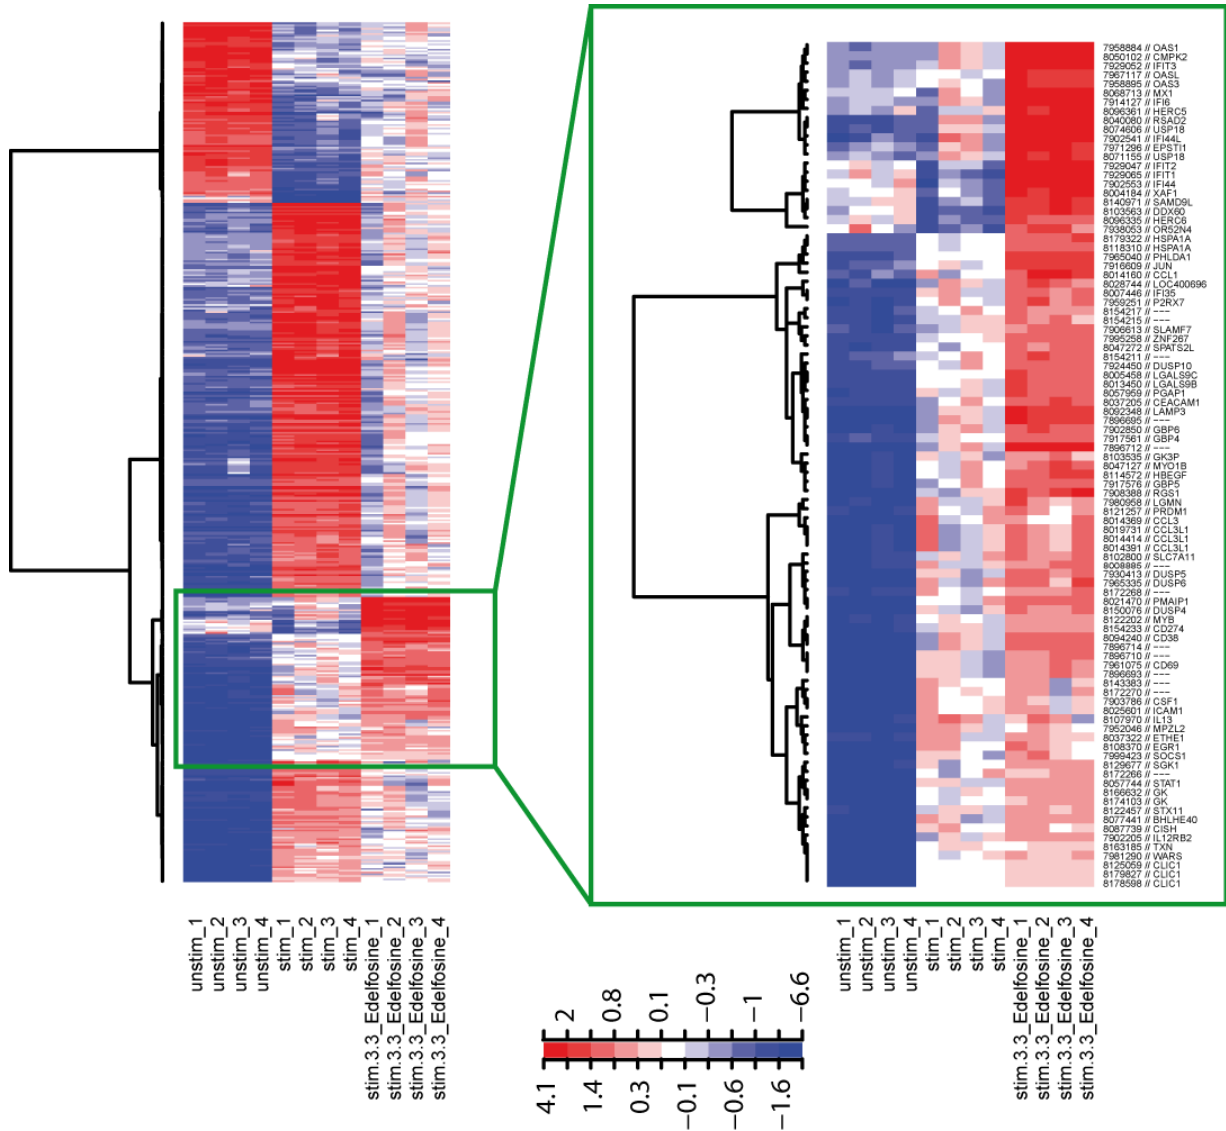

Supplement: pone.0091970.s003.pdf [file pone.0091970.s003.pdf]
